# Supplementary material for: An efficient and scalable analysis framework for variant extraction and refinement from population-scale DNA sequence data
Source: PubMed Central journal article supplement — Genome Res. 2015 Jun;25(6):918–25. doi: 10.1101/gr.176552.114 (PMC4448687; doi:10.1101/gr.176552.114), 2015-06
Supplement: supp_gr.176552.114_Supp_FigS1.pdf [file supp_gr.176552.114_Supp_FigS1.pdf]

**a**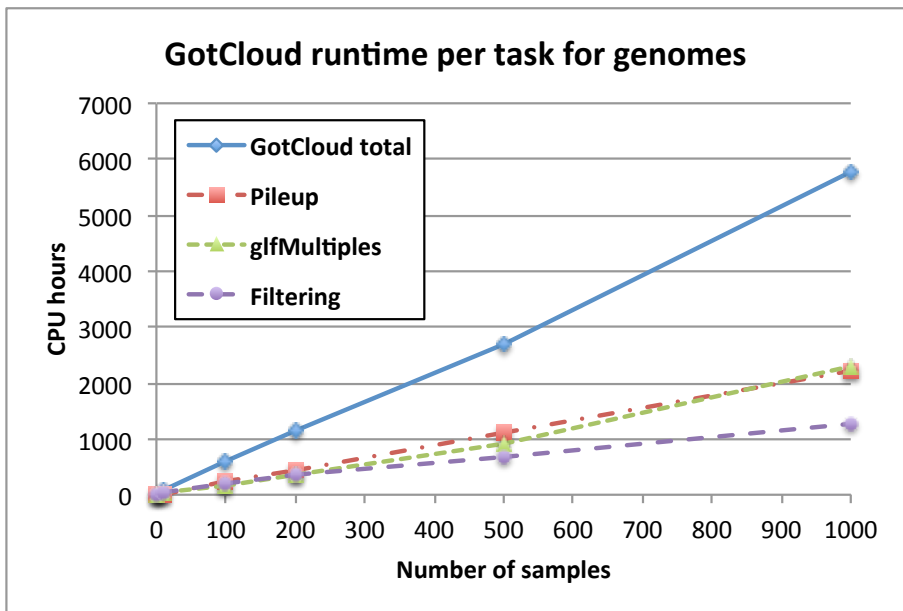**b**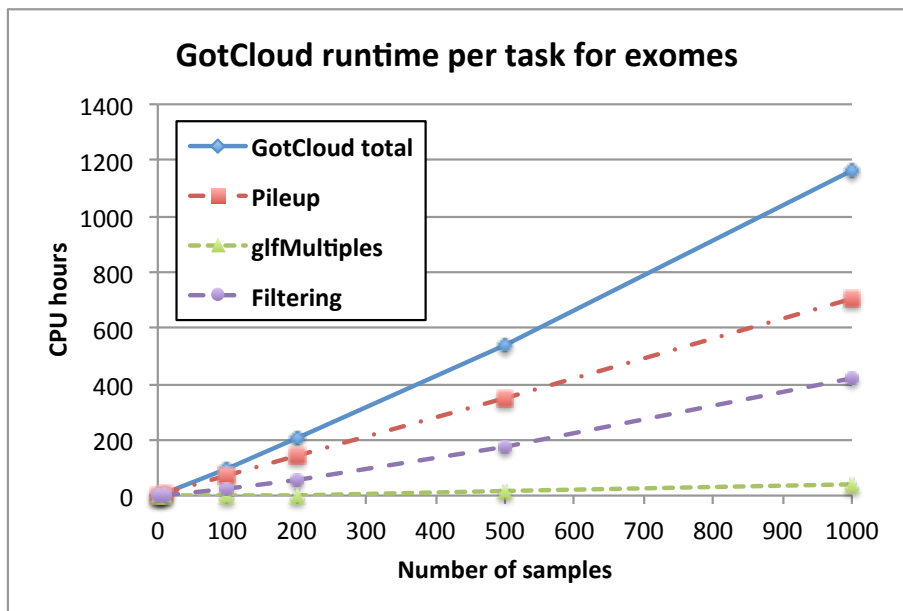

**Supplementary Figure S1.** a) GotCloud runtime broken down into sub-tasks for low-pass genome. b) Sub-task runtime estimates for deep exomes. Runtimes were measured using a single 5 mega-base genomic region of chromosome 20, and scaled by 600 to estimate the time required for processing the whole genome.
