# Supplementary material for: An efficient and scalable analysis framework for variant extraction and refinement from population-scale DNA sequence data
Source: PubMed Central journal article supplement — Genome Res. 2015 Jun;25(6):918–25. doi: 10.1101/gr.176552.114 (PMC4448687; doi:10.1101/gr.176552.114), 2015-06
Supplement: supp_gr.176552.114_Supp_TableS1.pdf [file supp_gr.176552.114_Supp_TableS1.pdf]

**Supplementary Table S1.** GotCloud parameters for initial hard-filtering used in the experiments.

| Filter Type                                   |     | Low-pass |       |       | Deep Exome |       |       |
|-----------------------------------------------|-----|----------|-------|-------|------------|-------|-------|
|                                               |     | 10       | 100   | 1000  | 10         | 100   | 1000  |
| Variant Quality                               | Min | 5        | 5     | 5     | 20         | 20    | 20    |
| Overall Depth                                 | Min | 10       | 100   | 1K    | 20         | 200   | 2K    |
|                                               | Max | 200      | 2K    | 20K   | 5K         | 50K   | 500K  |
| Call Rate                                     | Min | 0.5      | 0.5   | 0.5   | 0.5        | 0.5   | 0.5   |
| Allele Balance                                | Max | 67       | 67    | 67    | 65         | 65    | 65    |
| Strand Bias (z-score)                         | Min | -5       | -5    | -5    | -10        | -10   | -10   |
|                                               | Max | 5        | 5     | 5     | 10         | 10    | 10    |
| Strand Bias (correlation)                     | Min | -0.2     | -0.15 | -0.15 | -0.2       | -0.15 | -0.15 |
|                                               | Max | 0.2      | 0.15  | 0.15  | 0.2        | 0.15  | 0.15  |
| Cycle Bias (z-score)                          | Max | 5        | 5     | 5     | 10         | 10    | 10    |
| Cycle Bias (correlation)                      | Max | 0.2      | 0.15  | 0.15  | 0.2        | 0.15  | 0.15  |
| Inbreeding Coefficient                        | Min | -0.2     | -0.2  | -0.2  | -0.2       | -0.2  | -0.2  |
| Non-ref/non-alt allele inflation              | Max | 3        | 3     | 3     | 3          | 3     | 3     |
| Distance to closest known Indel (1000G pilot) | Min | 5bp      | 5bp   | 5bp   | 5bp        | 5bp   | 5bp   |
| % Mapping Qual.<20                            | Max | 30       | 30    | 30    | 30         | 30    | 30    |
| % Low Quality Bases                           | Max | 20       | 20    | 20    | 30         | 30    | 30    |
| # Failed Filters for SVM                      | Min | 3        | 3     | 3     | 3          | 3     | 3     |
