# Supplementary material for: An efficient and scalable analysis framework for variant extraction and refinement from population-scale DNA sequence data
Source: PubMed Central journal article supplement — Genome Res. 2015 Jun;25(6):918–25. doi: 10.1101/gr.176552.114 (PMC4448687; doi:10.1101/gr.176552.114), 2015-06
Supplement: supp_gr.176552.114_Supp_TableS2.pdf [file supp_gr.176552.114_Supp_TableS2.pdf]

**Supplementary Table S2.** Summary of variant calling and effect of filtering for exome sequence data. 1000 exome BAM files were randomly selected from 1000G Phase I data. 10 sample results were averaged over 10 sets of 10 BAM files.

| # Sample | Filter | # SNPs total | # avg. SNPs per sample | %dbSNP (v129) | Non-syn.    |             | Synonymous  |             |      |
|----------|--------|--------------|------------------------|---------------|-------------|-------------|-------------|-------------|------|
|          |        |              |                        |               | Known Ts/Tv | Novel Ts/Tv | Known Ts/Tv | Novel Ts/Tv |      |
| 10       | None   | -            | 45,403                 | 16,240        | 70.7        | 2.15        | 1.13        | 5.30        | 3.23 |
|          | PASS   |              | 41,479                 | 14,859        | 75.3        | 2.19        | 1.54        | 5.38        | 4.17 |
|          | FAIL   | SVM          | 3,924                  | 1,381         | 22.2        | 1.36        | 0.47        | 2.91        | 1.20 |
| 100      | None   | -            | 127,664                | 16,397        | 41.2        | 2.18        | 1.34        | 5.36        | 3.63 |
|          | PASS   |              | 109,023                | 14,121        | 47.2        | 2.25        | 1.94        | 5.44        | 4.89 |
|          | FAIL   | SVM          | 18,641                 | 2,586         | 12.1        | 1.46        | 0.48        | 3.44        | 1.13 |
| 1,000    | None   | -            | 399,811                | 17,174        | 17.3        | 2.24        | 1.61        | 5.40        | 4.05 |
|          | PASS   |              | 324,381                | 13,801        | 20.1        | 2.33        | 2.31        | 5.55        | 5.49 |
|          | FAIL   | SVM          | 75,430                 | 3,373         | 5.2         | 1.53        | 0.57        | 3.32        | 1.39 |
