# Supplementary material for: An efficient and scalable analysis framework for variant extraction and refinement from population-scale DNA sequence data
Source: PubMed Central journal article supplement — Genome Res. 2015 Jun;25(6):918–25. doi: 10.1101/gr.176552.114 (PMC4448687; doi:10.1101/gr.176552.114), 2015-06
Supplement: supp_gr.176552.114_Supp_TableS3.pdf [file supp_gr.176552.114_Supp_TableS3.pdf]

**Supplementary Table S3.** Comparison of SNP call sets (unfiltered and filtered) between GATK UnifiedGenotyper and GotCloud for whole exome sequencing data. 1000 exome BAM files were randomly selected from 1000G Phase I data. 10 sample results were averaged over 10 sets of 10 BAM files.

| # Sample | Pipeline | Filter | # total SNP | # SNP per sample | # dbSNP (v129) | Nonsyn.     |             | Synonymous  |             |
|----------|----------|--------|-------------|------------------|----------------|-------------|-------------|-------------|-------------|
|          |          |        |             |                  |                | Known Ts/Tv | Novel Ts/Tv | Known Ts/Tv | Novel Ts/Tv |
| 10       | GotCloud | None   | 45,403      | 16,240           | 32,123         | 2.15        | 1.13        | 5.30        | 3.23        |
|          |          | SVM    | 41,479      | 14,859           | 31,251         | 2.19        | 1.54        | 5.38        | 4.17        |
|          | GATK     | None   | 41,795      | 14,376           | 29,894         | 2.15        | 1.03        | 5.29        | 3.09        |
|          |          | VQSR   | 35,918      | 12,483           | 28,034         | 2.21        | 1.58        | 5.39        | 4.32        |
| 100      | GotCloud | None   | 127,664     | 16,397           | 52,656         | 2.18        | 1.34        | 5.36        | 3.63        |
|          |          | SVM    | 109,023     | 14,121           | 50,613         | 2.25        | 1.94        | 5.44        | 4.89        |
|          | GATK     | None   | 126,245     | 15,929           | 51,806         | 2.18        | 1.19        | 5.45        | 3.37        |
|          |          | VQSR   | 96,786      | 12,305           | 48,349         | 2.26        | 2.13        | 5.54        | 5.24        |
| 1,000    | GotCloud | None   | 399,811     | 17,174           | 69,197         | 2.24        | 1.61        | 5.40        | 4.05        |
|          |          | SVM    | 324,381     | 13,801           | 65,251         | 2.33        | 2.31        | 5.55        | 5.49        |
|          | GATK     | None   | 446,978     | 19,196           | 69,529         | 2.27        | 1.54        | 5.61        | 3.93        |
|          |          | VQSR   | 311,452     | 12,524           | 64,502         | 2.35        | 2.35        | 5.74        | 5.51        |
